# Supplementary material for: Identification of a Mutation in the PFKP as a Causative Factor in Prenatal Glycolysis Defects and Embryonic Myocardial Hypoplasia
Source: Research Square preprint supplement (doi:10.21203/rs.3.rs-6341289/v1), 2025-04-07
Supplement: Supplementary file 1 [file 90daa2edc1d8b9ede30ea525.docx]

**Supplementary Materials**

**Detailed Methods**

**Genome sequencing and variants calling**

gDNA was extracted from whole blood or umbilical cord using the Qiagen DNA Blood Midi/Mini kit (Qiagen GmbH, Hilden, Germany). DNA libraries were prepared using the TruSeq PCR-free DNA HT sample preparation kit (Illumina, San Diego, CA USA) according to the manufacturer’s protocol. The size distribution and concentration of the libraries were respectively determined by Agilent 2100 Bioanalyzer and qualified using real-time PCR. DNA library was sequenced on Illumina Novaseq 6000 platform for paired-end 150bp reads. Then, raw image files were processed using BclTo Fastq (Illumina) for base calling and generating raw data. Low-quality sequencing reads were filtered out using a quality score 20 (Q20). The reads were aligned to the NCBI human reference genome (hg19/GRCh37) using the BWA. BAM files were subjected to single nucleotide polymorphism (SNP) analysis, duplication marking, indel realignment, and recalibration using GATK1.

GATK1, ExpansionHunter2, CNVnator3, and LUMPY4 were used to detect the per-sample SNV/INDEL, STR, CNV and SV. Pedigree SNV/INDEL spectrum was detected by GATK. SNV/INDEL low-depth (per-sample depth < 6), low variant quality (<100), low map quality (<55), or low genotype quality (per-sample quality < 30) were removed. Per-sample STRs with low depth (depth < 6), and low variant quality (<100) were removed. Pedigree STRs were merged by bcftools5. Per-sample CNVs with Q-value > 0.05, a fraction of reads with zero map quality > 0.5, or fraction of gap > 0 were removed. Pedigree CNVs coordinates with 1 bp overlap were merged by bedtools6. Pedigree SVs were genotyped SVTyper7. SVs with any of the quality control criticisms employed from Abel’s study8 were excluded: (1) The proportion of split-read and paired-end read counts < 10%; (2) mean sample quality < 150; (3) the deletion size < the insert size of sequencing library estimated by SVTyper; (4) deletion copy-number estimated by CNVnator3 > 0.5 or duplication copy-number < 1.5.

**Linkage analysis**

According to the disease status in pedigree and incidence rate, we assumed this is an autosomal dominant disease caused by a rare mutation. Rare bi-allele SNVs were used for linkage analysis. Allele frequency was annotated by VEP with gnomAD9 and ChinaMAP10 database. A threshold of allele frequency < 0.005 in gnomAD-EAS and ChinaMAP was used to determine the rare mutation marker. Merlin11 was used to estimate the linkage association of marker and disease. Firstly, a single-point logarithm of the odds (LOD) scores was calculated for all markers from the whole genome. Subsequently, an expected LOD (ELOD) score for this pedigree assuming a dominant model was calculated by SwiftLink. A threshold of single-point LOD score ≥ ELOD score was used to determine the peak of linkage association. Finally, a multi-point analysis of the linkage peak was used to determine the linkage region of the genome. Co-segmentations were identified from the rare SNVs, INDELs, STRs, SVs, and CNVs in the region. Statistical evidence for the pathogenicity of co-segregated SNV was indicated by full-likelihood Bayes factor11 (FLB) that was calculated by segregating R-package.

**Sequence variant filtering and prioritizing**

Sequencing variant filtering was performed as previously described12. Analysis was performed on all sequenced genomic regions including both exonic and intronic where good data coverage was guaranteed. Variant frequencies were determined in dbSNP147 (https://www.ncbi.nlm.nih.gov/SNP/), the 1000 Genomes Project(http://www.internationalgenome.org/), Exome Variant Server (http://evs.gs.washington.edu/EVS), ExAC (http://exac.broadinstitute.org/), gnomAD9, ChinaMAP10, and in-house database to remove common SNPs (minor allele frequency> 0.1%). SIFT (http://sift.jcvi.org), PolyPhen-2 (http://genetics.bwh.harvard.edu/pph2), MutationTaster(http://www.mutationtaster.org),REVEL(https://sites.google.com/site/revelgenomics/) and CADD (http://cadd.gs.washington.edu) were used for predicting the pathogenicity of missense variants, while Human Splicing Finder (http://www.umd.be/HSF) and MaxEntScan (http:// genes.mit.edu/burgelab/maxent/Xmaxentscan_scoreseq.html) were used for evaluating the effects on splicing. Moreover, databases such as OMIM (http://omim.org/), ClinVar(http://www.ncbi.nlm.nih.gov/clinvar), and Human Gene Mutation Database(http://www.hgmd.org) were used to determine variant harmfulness and pathogenicity where appropriate. Finally, filtering and prioritizing were performed to investigate potential detrimental variants such as nonsense, missense, frameshift, indel, and variants impacting splice for variant interpretation and classification according to ACMG guidelines13.

**IVF-ICSI and embryo biopsy**

After informed consent, the couple went through a controlled ovarian hyperstimulation cycle and got 7 mature metaphaseII oocytes retrieved, which were then fertilized through intracytoplasmic sperm injection (ICSI). Fertilization was confirmed 17 hours later, with 2PN observed in 5 zygotes. The zygotes were then cultured in G1-plus media (Vitrolife, Göteborg, Sweden) in a 37°C, 6% CO2 incubator (Thermo Scientific, Waltham, MA, USA). Five embryos successfully developed to Day 3 and got transferred to G2-plus media (Vitrolife, Göteborg, Sweden). Trophectoderm biopsy was performed on only 1 blastocyst which developed on Day 6. A sample of trophoblasts was collected for the later whole genome amplification (WGA) process. The blastocyst was then cryopreserved by vitrification. In preparation for embryo transfer, a hormone replacement therapy (HRT) cycle was initiated to optimize the uterine lining for implantation, involving estrogen supplementation followed by progesterone to mimic the natural menstrual cycle and prepare the endometrium for the embryo.

**WGA and sequencing**

WGA of the biopsied sample was carried out with multiple annealing and looping-based amplification cycles (MALBAC). Single-Cell WGA Kit (Yikon Genomics Inc.). WGA product was then prepared for the mutated allele revealed by sequencing with aneuploidy and linkage analyses (MARSALA), which enables the simultaneous detection of aneuploidy, known point variation, and linkage analyses in a single procedure, previously described by (Live births after simultaneous avoidance of monogenic diseases and chromosome abnormality by next-generation sequencing with linkage analyses.

**Mice transgenic lines**

We used CRISPR/Cas9 technology to introduce the target point mutation into C57BL/6J mice’s zygotes through homologous recombination repair. Cas9 mRNA and guide RNA (gRNA) were synthesized via in vitro transcription, and the oligo donor DNA was synthesized. Subsequently, we microinjected Cas9 mRNA, gRNA, and donor DNA into C57BL/6J mice’s zygotes to generate the F0 generation of mice. The F0 Pfkp R755W/+ males were bred to wild-type mice for two generations, and the genotypes of Pfkp R754W/+ founding males and all F2 offspring were confirmed by PCR and Sanger sequencing. F2 mice (Pfkp R754W/+) were intercrossed, and hearts derived from homozygous, heterozygous, and wild-type littermates were collected at desired developmental stages for specific assays, the breeding strategy is consistent across all assays unless where is specified. The details of gRNA, primers, and oligo donor sequences are provided in Table S3.

We generated a cardiac-specific Pfkp knockout (Pfkp-cKO) mouse line by crossing Pfkp flox/flox mice with Myh6 Cre (Cre+/-) mice. All mouse strains used were of the C57/B6 background. For experiments, embryos and neonatal mice of both sexes were grouped according to their genotypes. The day of detecting vaginal plugs at noontime was designated as E0.5, while the morning of observing newborns was designated as P0. Genotyping was performed using PCR on yolk sac or tail samples from the mice, utilizing Cre and allele-specific primers (Table S3).

**Genome editing**

The *PFKP* gene knockout in hESC was achieved utilizing Clustered Regularly Interspaced Short Palindromic Repeats technology. The resulting modified human pluripotent stem cells (hPSCs) were then guided through specific media to induce differentiation into cardiomyocytes, facilitating subsequent cell studies. We designed Single-guide RNAs (sgRNAs) to target exon 4 of the PFKP genome using online tools available at https://design.synthego.com/. Among the two sgRNAs tested (TCCCAGGGCGGGACGATCAT and GTCCCAGGCCTTCCGCACGC), the second sgRNA demonstrated higher editing efficiency. This second sgRNA was selected for genome editing in H9 cells. To facilitate this, we cloned the sgRNA into the epiCRISPR plasmid, following a previous publication14. We dissociated 2 × 106 H9 cells using 0.5 mmol/L EDTA and subsequently electroporated these cells with 3 μg of the epiCRISPR plasmid in a solution composed of 82μL of stem cell P3 solution and 18μL of supplement (Lonza). The electroporation procedure was carried out using the 4D nucleofector system with the CA137 program (Lonza). After transfection, the cells were plated onto Matrigel-coated 10cm Petri dishes and cultured in E8 medium supplemented with 10 µM Rho kinase inhibitor Y-27632 (MedChemExpress) for the initial 24 hours. On day 3, the cells underwent puromycin selection at a concentration of 0.3 μg/mL.

**Human embryonic stem cells (hESC) and human induced pluripotent stem cells (hiPS)**

Peripheral blood mononuclear cells (PBMCs) of the patient and normal people were isolated within 2 hours of collection using Vacutainer® CPT™ Cell Preparation Tubes with Sodium Heparin (BD Biosciences) and separated by centrifugation at 1800 relative centrifugal force (rcf) for 30 minutes at room temperature (RT). The freshly isolated PBMCs were then seeded at a density of 0.6× 106 cells in Expansion Medium (EM). Nine days later (Day 0), the cells were transduced using Sendai virus delivery with the CytoTune®-iPS 2.0 Sendai Reprogramming Kit (Thermo Fisher Scientific), following the manufacturer's instructions. The cell-containing plate was then centrifuged at 900 rcf for 90 minutes at RT and incubated for 24 hours. The following day, the cells were collected, centrifuged at 300 rcf for 5 minutes at RT, and seeded in fresh EM (Day 1). Two days later (Day 3), the cells were transferred to a 6 cm dish coated with 0.1% gelatin and co-cultured with 0.8 × 106 Mitomycin C-treated mouse embryonic fibroblasts (MEF) in QBSF-60 medium (Quality Biological) supplemented with 50 μg/ml ascorbic acid. Seven days post-transduction (Day 7), the medium was replaced with mTESR-1 medium (Stem Cell Technologies). Colonies displaying an embryonic stem (ES)-like appearance were manually isolated based on morphology between Day 21 and Day 27 post-transduction and subsequently cultured as induced pluripotent stem cells (iPSCs).

Patient-derived hiPSC cells were transfected with sgRNA/Cas9 RNP + ssODN complexes (for sequence details, please refer to Table). Subsequently, a portion of the transfected cells was harvested for sequencing. Mixed cell populations were amplified, individual clones were selected, and PCR amplification, as well as first-generation sequencing identification, were carried out. Human iPSC cultures were maintained on plates coated with Matrigel (Corning) in mTESR-1 medium (Stem Cell Technologies), following the manufacturer's instructions. All cells were cultured at 37°C in a humidified atmosphere containing 5% CO2.

**Lentivirus transfected cells**

DNA sequences encoding isoforms of human PFKP WT were PCR-amplified from a human NCBI library and cloned into pcDNA6/myc-His (Invitrogen) using NEBuilder (NEB) to construct pcDNA6-PFKPWT-myc-Flag. The plasmids were verified by sequencing at the Support Unit for Bio-Material Analysis of RIKEN RRD. 24 hours before lentiviral transfection, cardiomyocytes were seeded in a 12-well plate at a density of 4×105 cells per well. The cell density during lentiviral transfection remained at approximately 4×105 cells per well. The viral suspension was diluted to achieve an MOI of 5 and incubated at 37°C for 24 hours. Subsequently, the virus-containing medium was replaced with a fresh medium. After an additional 72 hours of incubation, pronounced fluorescent expression became evident.

**Histology**

For histological studies, hearts were harvested at the indicated time points. The entire hearts were fixed overnight at 4 °C in 4% paraformaldehyde (PFA, Sigma). Subsequently, the hearts underwent dehydration through a series of increasing ethanol concentrations and were then embedded in paraffin. The embryonic mice hearts were longitudinally sectioned 7μm for each tissue section. The tissue section was stained with hematoxylin-eosin (Solarbio)， following the manufacturer’s instructions. The HE-stained tissue sections were scanned using the Pannoramic MIDI II slide scanner and analyzed using the Caseviewer software.

**Immunofluorescence**

The cells were initially treated by fixation in a solution containing 4% paraformaldehyde (PFA), followed by permeabilization with 1.0% Triton X-100 (Sigma) for 15 minutes. Subsequently, they were subjected to a blocking step using 3% BSA (Sigma) at room temperature for 30 minutes. Next, the cells were incubated with the primary antibody overnight at 4°C and later incubated with a secondary antibody at 37°C for 1 hour. Following this, the cells were subjected to three 5-minute washes with PBST. Finally, they were counterstained with DAPI for 5 minutes, and the images were acquired using a Leica DMI 4000B confocal microscope (Leica).

The paraffin-embedded heart slides were de-paraffinized with xylene and then rehydrated in decreasing concentrations of ethanol (100, 100, 95, 90, and 80%) and water. The heart slides underwent antigen retrieval by microwaving in citrate solution for 10 min; then, the slides were blocked with 10% goat serum (Invitrogen) and incubated with the primary antibody overnight at 4 °C. The next day, the slides were washed in PBST three times and incubated with the appropriate fluorescent secondary antibody at 37°C for 1 hour. The slides were washed in PBST three times and then stained with DAPI to label the nuclei. The results were analyzed using the ImageJ software program.

**Western blot**

Select 50 mg of human and mouse ventricular tissue to extract protein, and put them into 200 μl of pre-configured protein lysis solution (containing Mammalian Protein Extraction Reagent (Thermo, #78501, USA) supplemented with 5 mM EDTA (Thermo, #1861275), along with a protease inhibitor cocktail (Thermo, #1861278) and a phosphatase inhibitor cocktail (Thermo, #1862495). The cells were washed with cold PBS and resuspended in protein lysis solution. The samples were placed on ice for 30 minutes, with intermittent agitation every 10 minutes, followed by centrifugation at 12,000 rpm for 15 minutes. The protein concentration in the resulting supernatant was determined using the BCA method. Equivalent amounts of denatured protein were separated by electrophoresis on 8–12% sodium dodecyl sulfate-polyacrylamide gels, depending on the protein size. The gel was subsequently transferred to a PVDF membrane at 300 mA for 90 minutes using a gel transfer apparatus (Bio-Rad). Afterward, the membrane was blocked with 5% nonfat milk powder at room temperature for 1 hour. Primary and secondary antibodies with appropriate concentrations were used for membrane incubation. All primary antibodies were incubated at 4°C overnight, while secondary antibodies were incubated at room temperature for 1 hour. Details of all specific antibody catalog numbers used in the article are provided in Table S4.

**Quantitative reverse transcription PCR (qRT-PCR).**

Quantitative reverse transcription PCR (qRT-PCR) was conducted as follows: Total RNAs were extracted from ventricles or cultured cardiomyocytes (CMs) using TRIzol reagent (Life Technologies). Subsequently,1μg RNA was reverse transcribed into cDNA by the PrimeScript™ reverse transcription system (Takara)according to the manufacturer's instructions. qRT-PCR was then performed on iCycler iQ5 (Bio-Rad) with 2 × SYBR Master Mix (Takara). Specific primer sequences are provided in Table S3. To normalize the relative expression of each gene, 18sRNA was used as an internal reference, and calculations were performed utilizing the 2−ΔΔCT method. For robustness, biological replicates were carried out using three individual samples of each genotype, and technical triplicates were included for each qPCR run.

**PFK enzymatic assay.**

We assessed the activity of the PFK1 enzyme in cells and tissues using the 6-Phosphofructokinase Activity Assay Kit (Abcam, ab155898). Fresh mouse heart tissue was harvested, and the requisite number of cells (initially recommended: 2 x 106 cells) was collected for each assay. Protein quantification in the samples was performed, with an initial recommended protein input of 5µg per sample. Subsequently, we followed the manufacturer's instructions provided with the kit. To determine PFK1 enzyme activity, we generated enzyme activity curves by measuring absorbance at 450nm using a microplate reader. The time during which the curve displayed a stable slope was selected for the calculation of enzyme activity. The control group was set as 100% and statistical analyses were conducted. Time-absorbance curves were plotted using Igor software, and statistical graphs were generated using Prism 8 (GraphPad).

**Seahorse ECAR measurement**

For the Seahorse XF ECAR assay, 5×104 hPSC-CMs/well were seeded onto an XFe24 cell culture microplate coated with Matrigel 48 hours before the assay. To prepare the glycolysis assay media, we prepared a solution of 2mmol/L glutamine (103579-100, Agilent) using Seahorse XF Basal Medium (103334-100, Agilent). Approximately 60 minutes before the assay, we washed the cells with 1 ml of glycolysis assay media and incubated them for 45 minutes at 37 °C without CO2. Afterward, we added 450 μL of detection solution to each well. The assay cartridge was loaded with XF Cell Glycolytic Stress Test compounds (10 µM glucose, 1 µM oligo, 50 mM 2-DG). The XF Cell Culture Microplate was promptly inserted into the Seahorse XFe Analyzer, and the XF Cell Mito Stress Test was initiated. Following the measurement of extracellular acidification rate (ECAR), hPSC-CMs were dissociated, and the cell count in each well was determined. The ECAR values were normalized per 10,000 cells. Data analysis was performed using Wave software (Agilent).

**Flow cytometry**

Hpsc-CMs were isolated using CardioEasy CM dissociation buffer I (Cellapy) at 37°C for 15 minutes and CardioEasy CM dissociation buffer II (Cellapy) at 37°C for 30 minutes. Following this, the cells underwent three PBS washes and were fixed with 4% paraformaldehyde (PFA, Sigma) for 30 minutes at room temperature. After three 3% BSA washes, the cells were permeabilized with 1.0% Triton X-100 (Sigma) for 15 minutes. After another three 3% BSA washes, the cells were treated with the primary antibodies for 12 hours at 4°C. Subsequently, the samples were rinsed with 3% BSA and then treated with the secondary antibodies for 2 hours at 37°C. The samples were rinsed the secondary antibody three times with PBS solution.Following the washing steps, resuspend the secondary antibody in 500μL PBS. Assessed using FACS analysis (EPICS XL). After the PBS wash, the cells were resuspended following centrifugation in PBS and stored on ice until flow cytometry was conducted. The results were analyzed using the FlowJo X software program.

**Metabolomic analysis**

Unsupervised PCA (principal component analysis) was performed by statistics function prcomp within R (www.r-project.org). The data was unit variance scaled before unsupervised PCA. The HCA (hierarchical cluster analysis) results of samples and metabolites were presented as heatmaps with dendrograms, while Pearson correlation coefficients (PCC) between samples were calculated by the cor function in R and presented as only heatmaps. Both HCA and PCC were carried out by R package pheatmap. For HCA, normalized signal intensities of metabolites (unit variance scaling) are visualized as a color spectrum. Significantly regulated metabolites between groups were determined by absolute LogFC (fold change).

**Supplemental Figures and Legends**


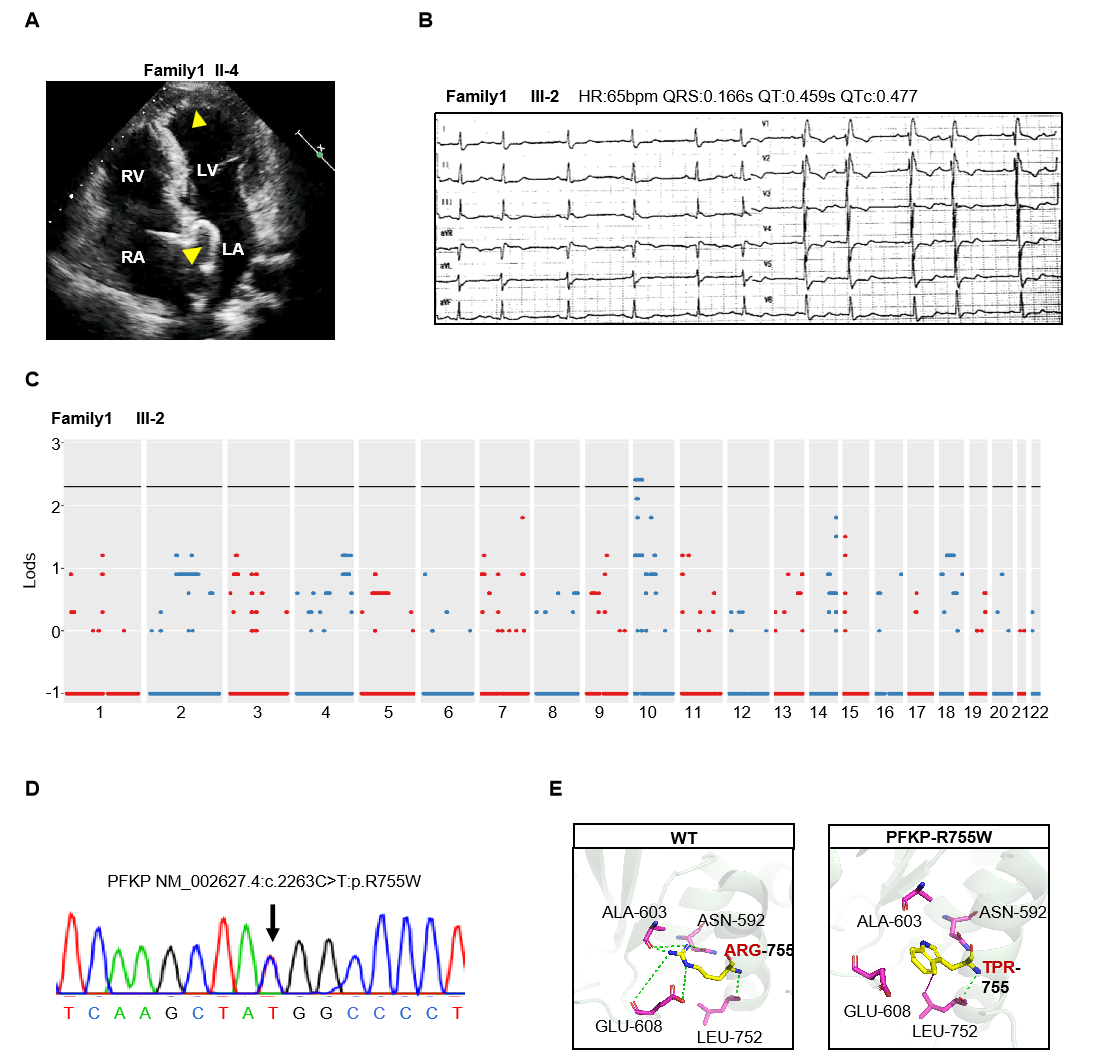


**FigureS1. Pathogenicity, echocardiography, and electrocardiography analysis in Family 1 with myocardial hypoplasia**

1. Representative echocardiography of Familiy 1 (II-4), after the repair of atrial septal defects (indicated by the below arrowhead) and a blunt left ventricular (indicated by the up arrowhead).
2. Representative electrocardiogram of Familiy1 (III-2) indicates right bundle branch block.
3. Linkage analysis of Family1. The X-axis represents genetic markers at autosomes, while the Y-axis denotes the logarithm of the odds (LOD) scores calculated by Merlin non-parametric linkage analysis. The horizontal line indicates the expected LOD (ELOD) score of 2.3 estimated from the pedigree. A signal at chr10 surpasses the threshold of ELOD, signifying a genomic region linked to the disease locus.
4. Representative Sanger sequencing of Family 1(III-2) confirms the mutant PFKP motif of R755W.
5. Three-dimensional structure prediction of the PFKP R755W mutation on the protein structure. Left: Wild-type PFKP with arginine (highlighted in red). Right: Variant PFKP with tryptophan substitution (highlighted in red), indicating an anticipated abnormal protein structure. The PFKP R755W variant (bottom) exhibits the disappearance of the covalent bonds (depicted in light green).

LA: left atrium; LV: left ventricle; RA: right atrium; RV: right ventricle;


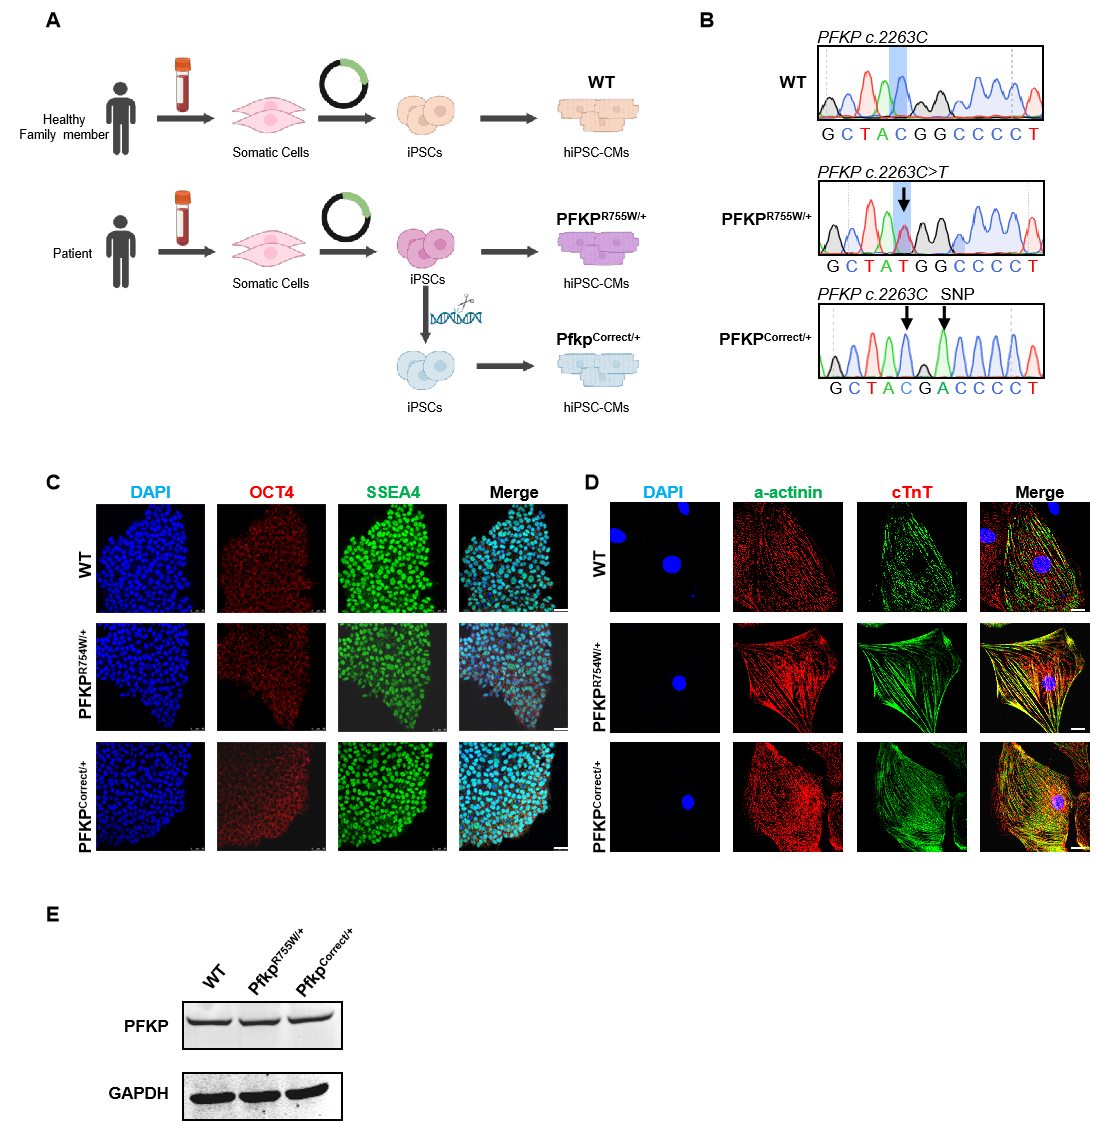


**FigureS2. Establishment and validation of patient-derived hiPSC-CM models**

1. Schematic showing the reprogramming of somatic cells into hiPSCs and their differentiation into cardiomyocytes using samples from a healthy family member (WT) and a patient (PFKPR755W/+) in Family 1. Genetic correction of the patient-derived hiPSCs resulted in hiPSCs (PFKPCorrect/+) with the same genetic background as the patient but without the PFKP R755W mutation.
2. Sanger sequencing of hiPS from a healthy control (WT), a patient with the R755W variant (PFKPR755W/+), and hiPS corrected for the R755W variant (PFKP Correct/+).
3. Representative immunofluorescence images showing the expression of pluripotency markers OCT4 and SSEA4 in WT, PFKP R755W/+, and PFKP Correct/+ hiPSCs. Scale bars: 50μm.
4. Representative immunofluorescence images showing the expression of cardiac-specific markers cTnT and α-actinin in WT, PFKPR755W/+, and PFKPCorrect/+ hiPS-CMs. Scale bars:20μm.
5. PFKP protein expression of WT, PFKPR755W/+, and PFKPCorrect/+ hiPS-CMs.


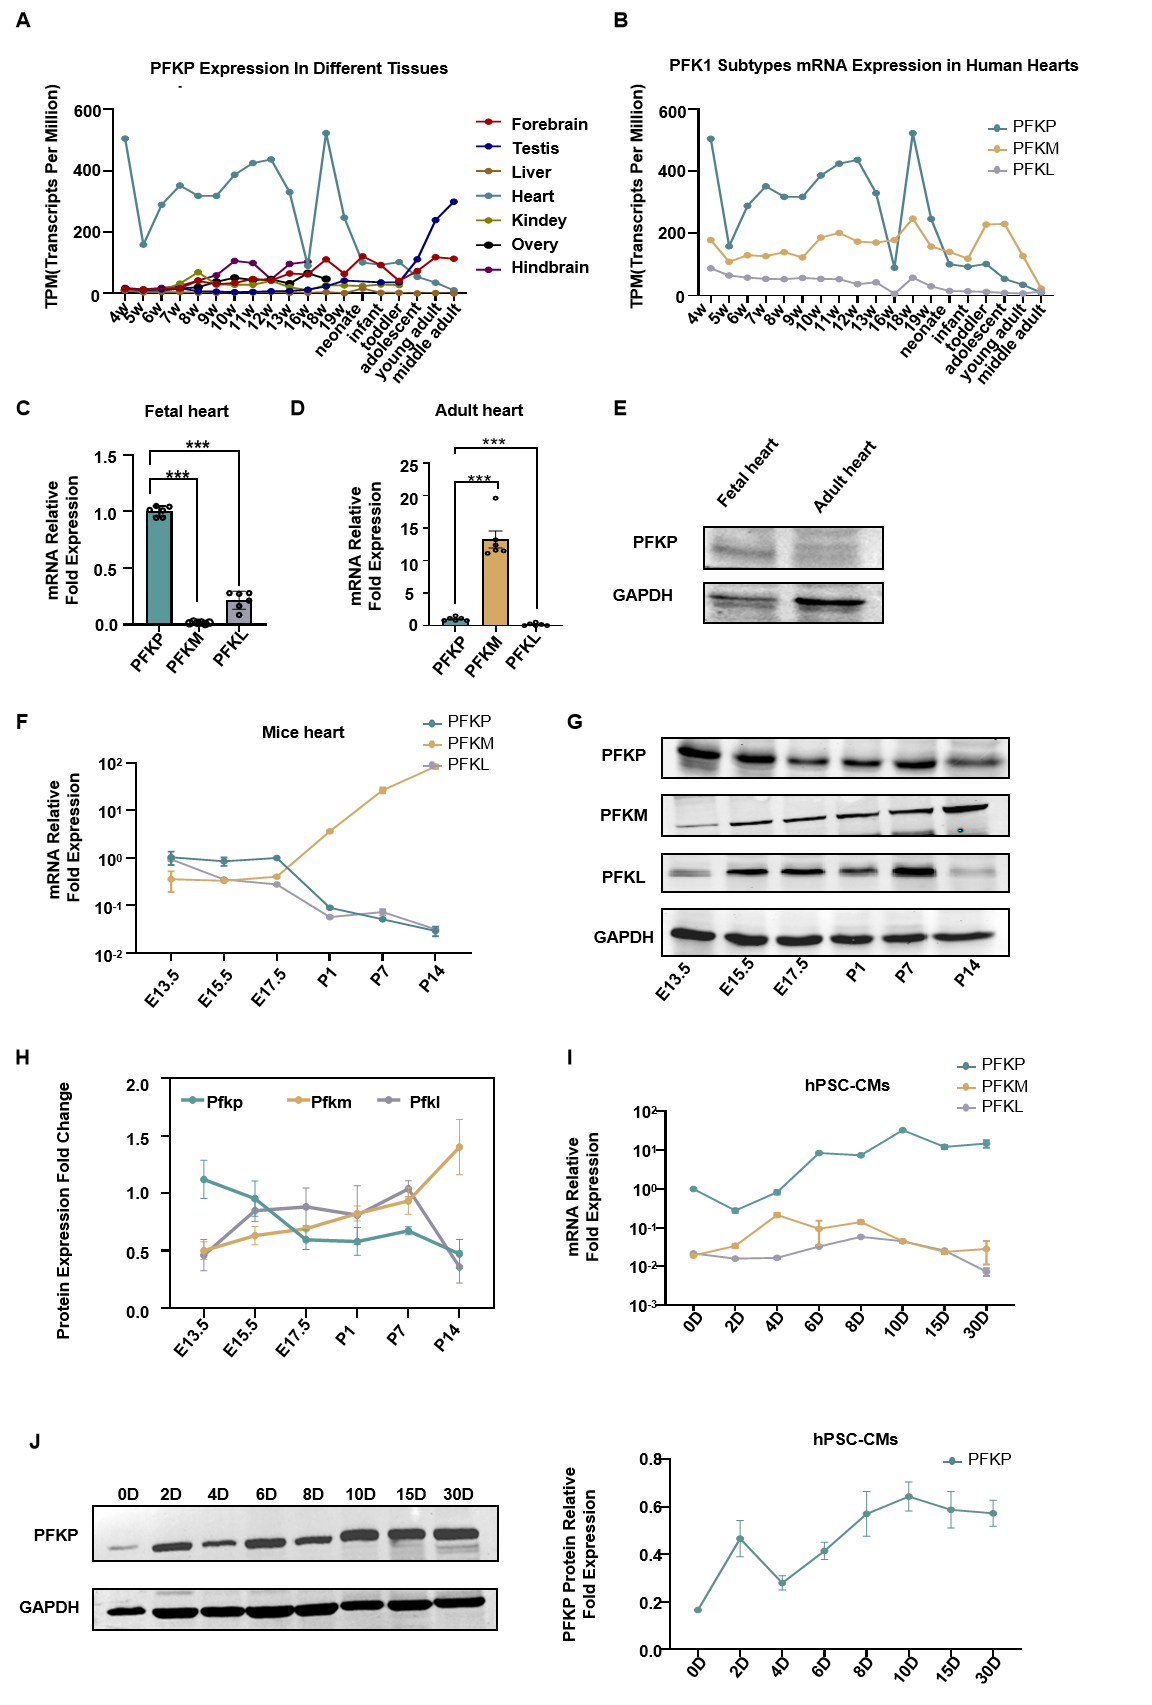


**FigureS3. Expression profile of PFKP in mouse and human embryonic hearts**

1. PFKP mRNA expression in Expression Atlas database across various tissues, with higher abundance observed in the fetal heart compared to other tissues such as the liver, forebrain, and kidney.
2. mRNA expression of three phosphofructokinase genes (PFKP, PFKM, and PFKL) in Expression Atlas database during different stages of human hearts, highlighting PFKP as the dominant type during the fetal period.
3. PFKP, PFKM, and PFKL mRNA expression in heart tissue of prenatal 22 weeks fetal, experimental analysis shows that PFKP plays a significant function in the fetal hearts.18sRNA was used as the loading control (n=6 per group).
4. PFKP, PFKM, and PFKL mRNA expression in heart tissue of 34-year-old adults. 18sRNA was used as the loading control (n=6 per group).
5. Representative immunoblot of PFKP in fetal and adult heart tissues. Representative PFKP immunoblot of protein extracts from fetal and adult heart tissues, with GAPDH as the loading control.
6. mRNA expression of Pfkp, Pfkm, and Pfkl in mice hearts. mRNA expression of Pfkp, Pfkm, and Pfkl in mouse hearts at different embryonic and postnatal periods (E13.5, E15.5, E17.5, P1, P7, P14), highlighting the peak expression of Pfkp at mouse E13.5. 18sRNA serves as the loading control (n=3 per group).
7. Representative protein expression of protein expression of PFK1 isoforms (Pfkp, Pfkm and Pfkl) at different embryonic and postnatal stages. Gapdh as the loading control.
8. Relative protein expression of Pfkp, Pfkm, and Pfkl at different embryonic and postnatal stages. Gapdh as the loading control (n=3 per group).
9. Relative mRNA expression of PFKP, PFKM, and PFKL during the differentiation process of hiPS-CMs. Quantitative PCR analysis reveals varying expression patterns during differentiation. 18sRNA serves as the loading control (n=3 per group).
10. Representative immunoblot of PFKP in hiPS-CMs differentiation and quantitative analysis of protein expression (n=3 per group). PFKP protein expression increases during the differentiation process of hiPS-CMs, with the highest levels observed in immature cardiomyocytes at 10-day and 15-day time points. GAPDH as the loading control.

Statistical significance was determined with one-way ANOVA, Mean ± S.D, n.s., not significant (P>0.05); *P<0.05, **P<0.01, ***P<0.001).


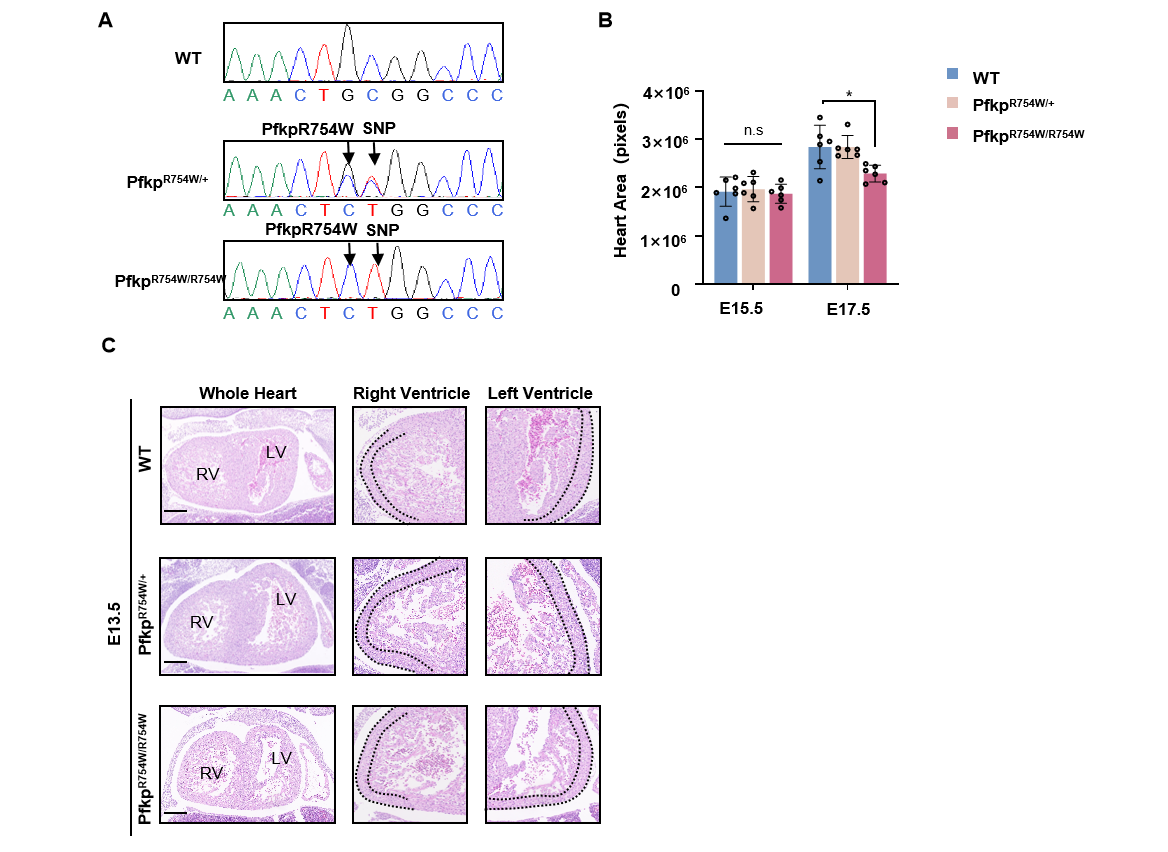


**FigureS4. E13.5 Myocardial compact layer thickness in Pfkp mutation Mice**

1. Sanger sequencing for WT, PfkpR754W/+, and PfkpR754W/R754W mice. SNP (Single Nucleotide Polymorphism) is a synonymous substitution intended to prevent secondary cleavage of gRNA.
2. Heart Area Comparison. Maximum ventricular area of the four-chambered heart section at E15.5 and E17.5 (n=6 per group).
3. Representative hematoxylin and eosin (HE) staining of WT, PfkpR754W/+, and PfkpR754W/R754W in E13.5 mice hearts. Scale bar: 200 μm.
4. Representative HE staining of WT, PfkpR754W/+, and PfkpR754W/R754W in E15.5 mice hearts. Scale bar: 600 μm.
5. Representative HE staining of WT, PfkpR754W/+, and PfkpR754W/R754W in E17.5 mice hearts. Scale bar: 600 μm.
6. Quantification of left and right ventricular wall thickness between the PfkpR754W/+, PfkpR754W/R754W and WT mice at different embryonic days (n=6 per group).

Statistical significance was determined with one-way ANOVA, Mean ± S.D, n.s., not significant (P>0.05); *P<0.05, **P<0.01, ***P<0.001).


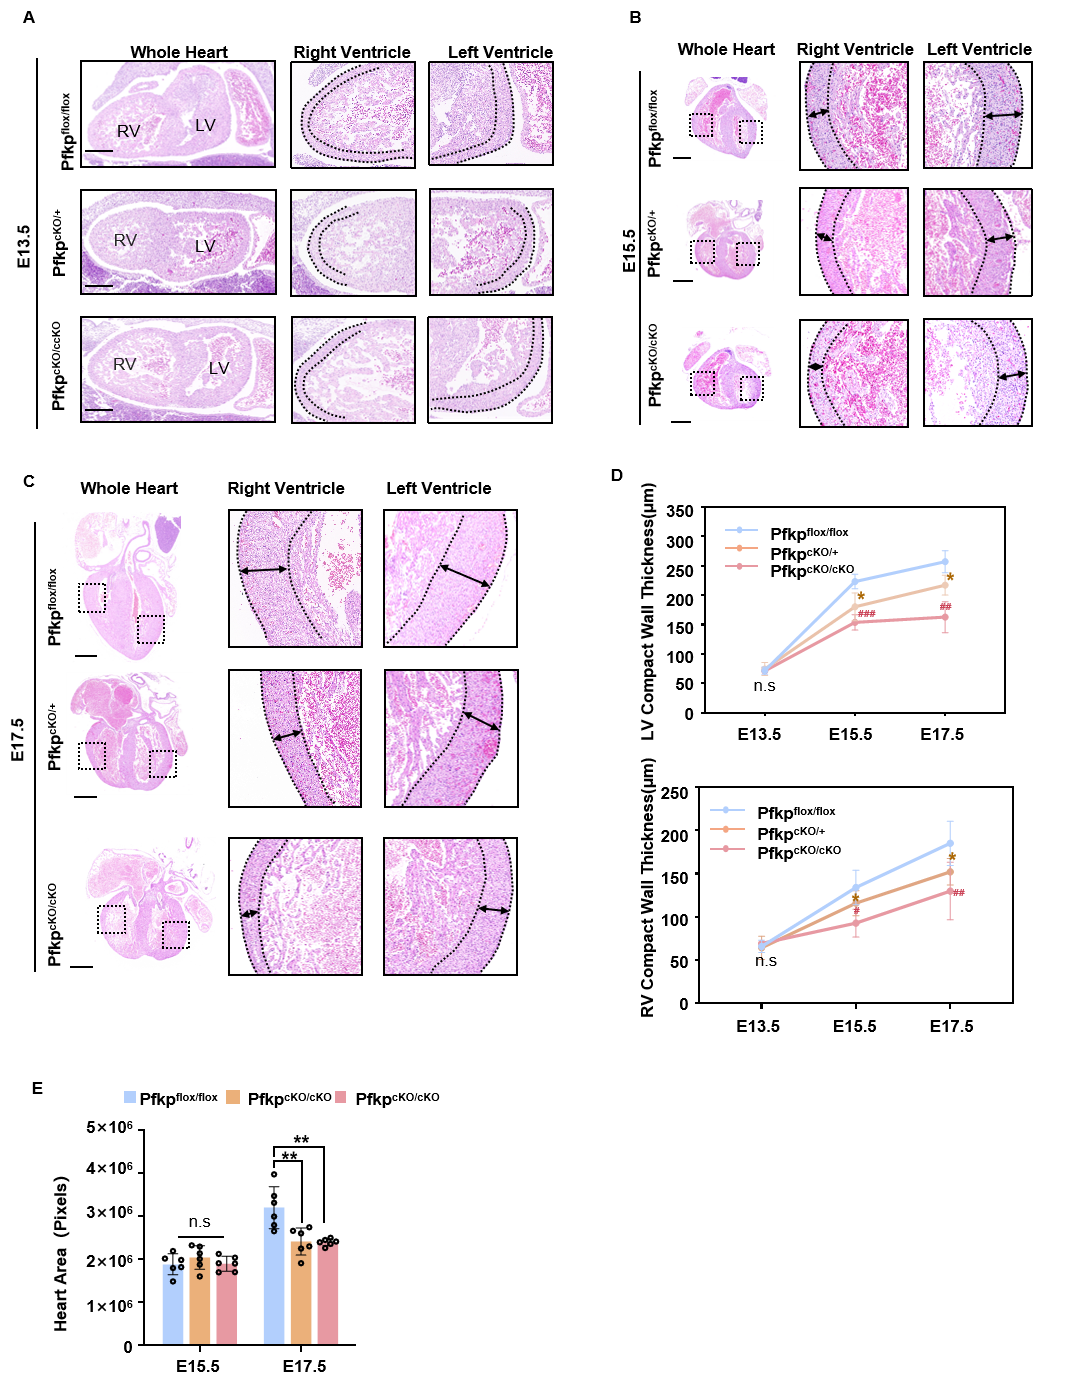


**FigureS5. Embryonic cardiac phenotypes of Pfkp knockout mice reveal impaired myocardial development.**

1. Representative images of HE staining of heart sections at E13.5 in PfkpcKO/+, PfkpcKO/Cko and Pfkpflox/flox mice. Scale bar: 200 μm.
2. Representative HE staining of PfkpcKO/+, PfkpcKO/Cko and Pfkpflox/flox in E15.5 mice hearts. Scale bar: 600 μm.
3. Representative HE staining of PfkpcKO/+, PfkpcKO/Cko and Pfkpflox/flox mice in E17.5 mice hearts. Scale bar: 600 μm.
4. Quantification of left and right ventricular wall thickness between the PfkpcKO/+, PfkpcKO/Cko and Pfkpflox/flox mice at different embryonic days (n=6 per group).
5. Heart Area Comparison for Pfkpflox/flox, PfkpcKO/+, and PfkpcKO/cKO. Maximum ventricular area of the four-chambered heart section at E15.5 and E17.5(n=6 per group).

Mean ± S.D, One-way ANOVA, n.s., not significant (P>0.05); *P<0.05, **P<0.01,***P<0.001).


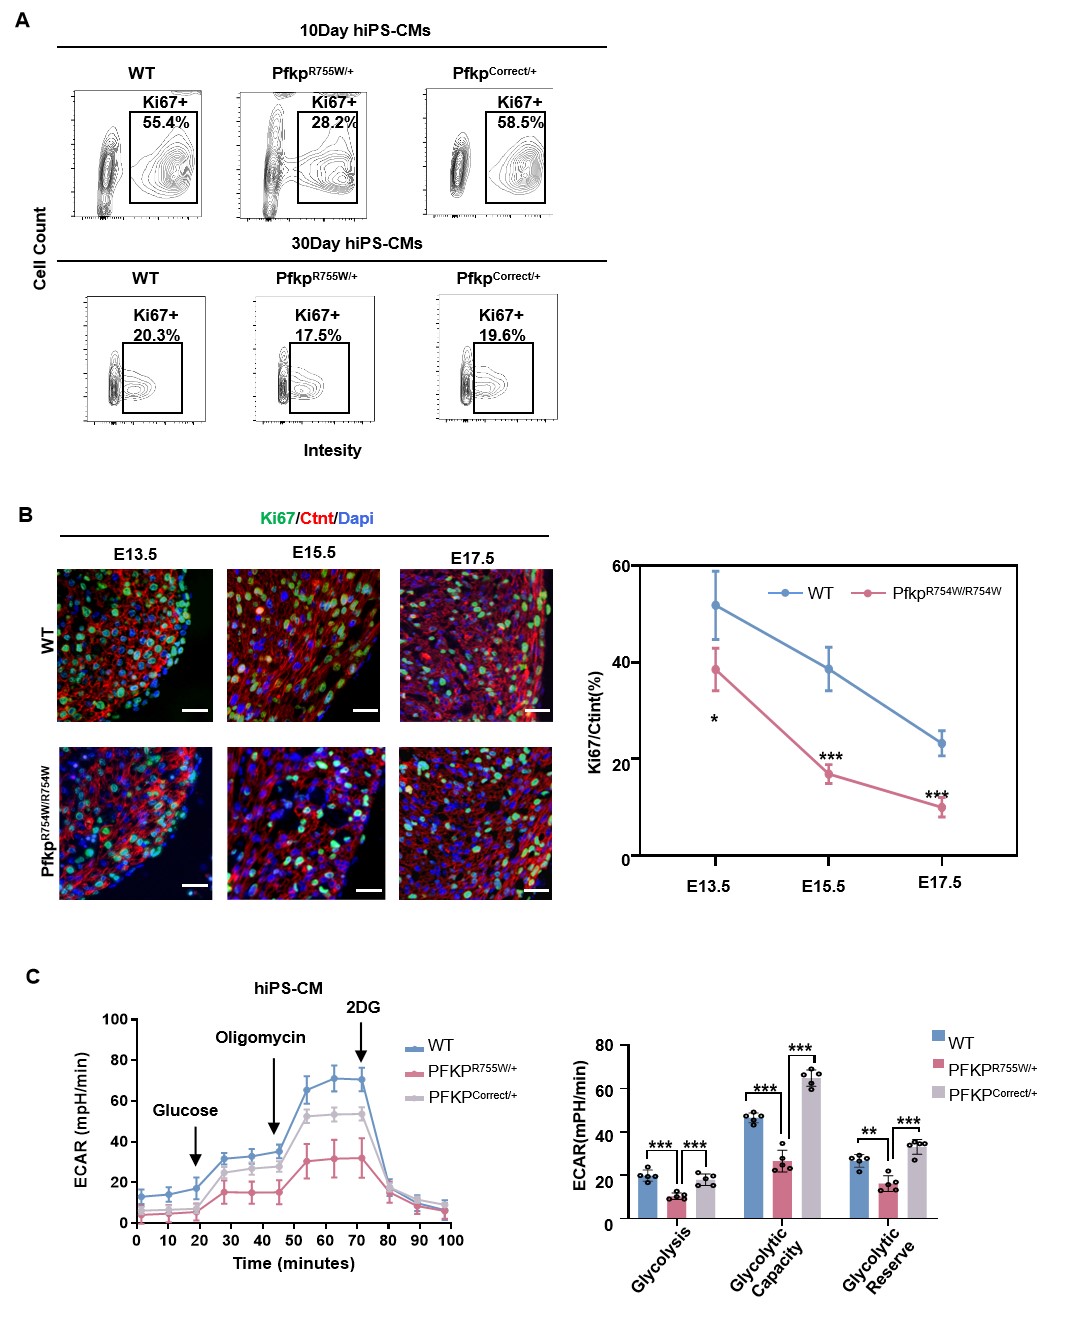


**FigureS6. Proliferation flow cytometry in Pfkp mutation hiPS-CMs**

1. Representative images of Ki67 flow cytometry in WT, PFKPR755W/+, and PFKPCorrect/+ hiPS-CMs on day 10 and 30 of differentiation.


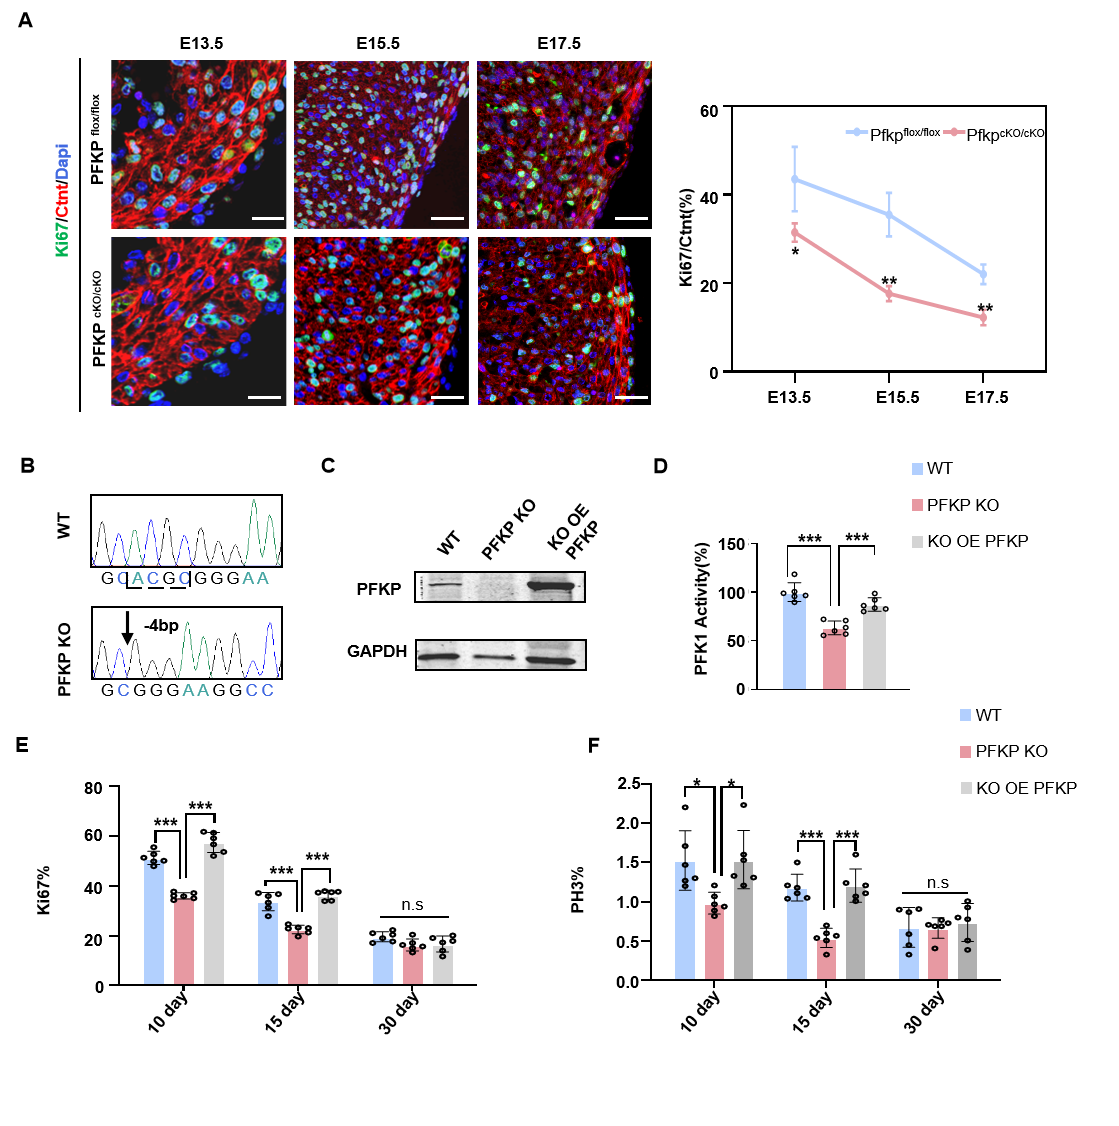


**FigureS7. Myocardial proliferation analysis in PFKP knockout hESC-CMs and embryonic hearts.**

1. Ki67 heart immunofluorescence in Pfkpflox/floxand PfkpcKO/cKO mice at E13.5, E15.5, and E17.5; cardiomyocyte proliferation was significantly lower in the PfkpR754W/R754W group than in the normal control (n=5 per group). Scale bar:30μm.
2. Sanger sequencing for DNA sequence analysis of PFKP knockout (KO) by CRISPR-Cas9 in hESC-CMs
3. Western blot of PFKP protein of WT, PFKP KO, and PFKP KO overexpression of PFKP WT protein (KO OE PFKP) 15-day hESC-CMs. PFKP KO lentivirus-transfected with PFKP WT at Day 6 of cardiomyocyte differentiation. GAPDH serves as the loading control.
4. PFKP deletion leads to reduced PFK1 enzyme activity. Overexpression of PFKP restores the PFK1 enzyme activity caused by PFKP knockout (n=6 per group).
5. Quantification of proliferation via Ki67 flow cytometry in WT, PFKP KO and KO OE PFKP hESC-CMs on Day 10,15,30 of differentiation (n=6 per group).
6. Quantification of proliferation via PHH3 flow cytometry in WT, PFKP KO and KO OE PFKP hESC-CMs on Day 10,15,30 of differentiation (n=6 per group).

Statistical significance was determined with one-way ANOVA, Mean ± S.D, n.s., not significant (P>0.05);*P<0.05,**P<0.01,***P<0.001).


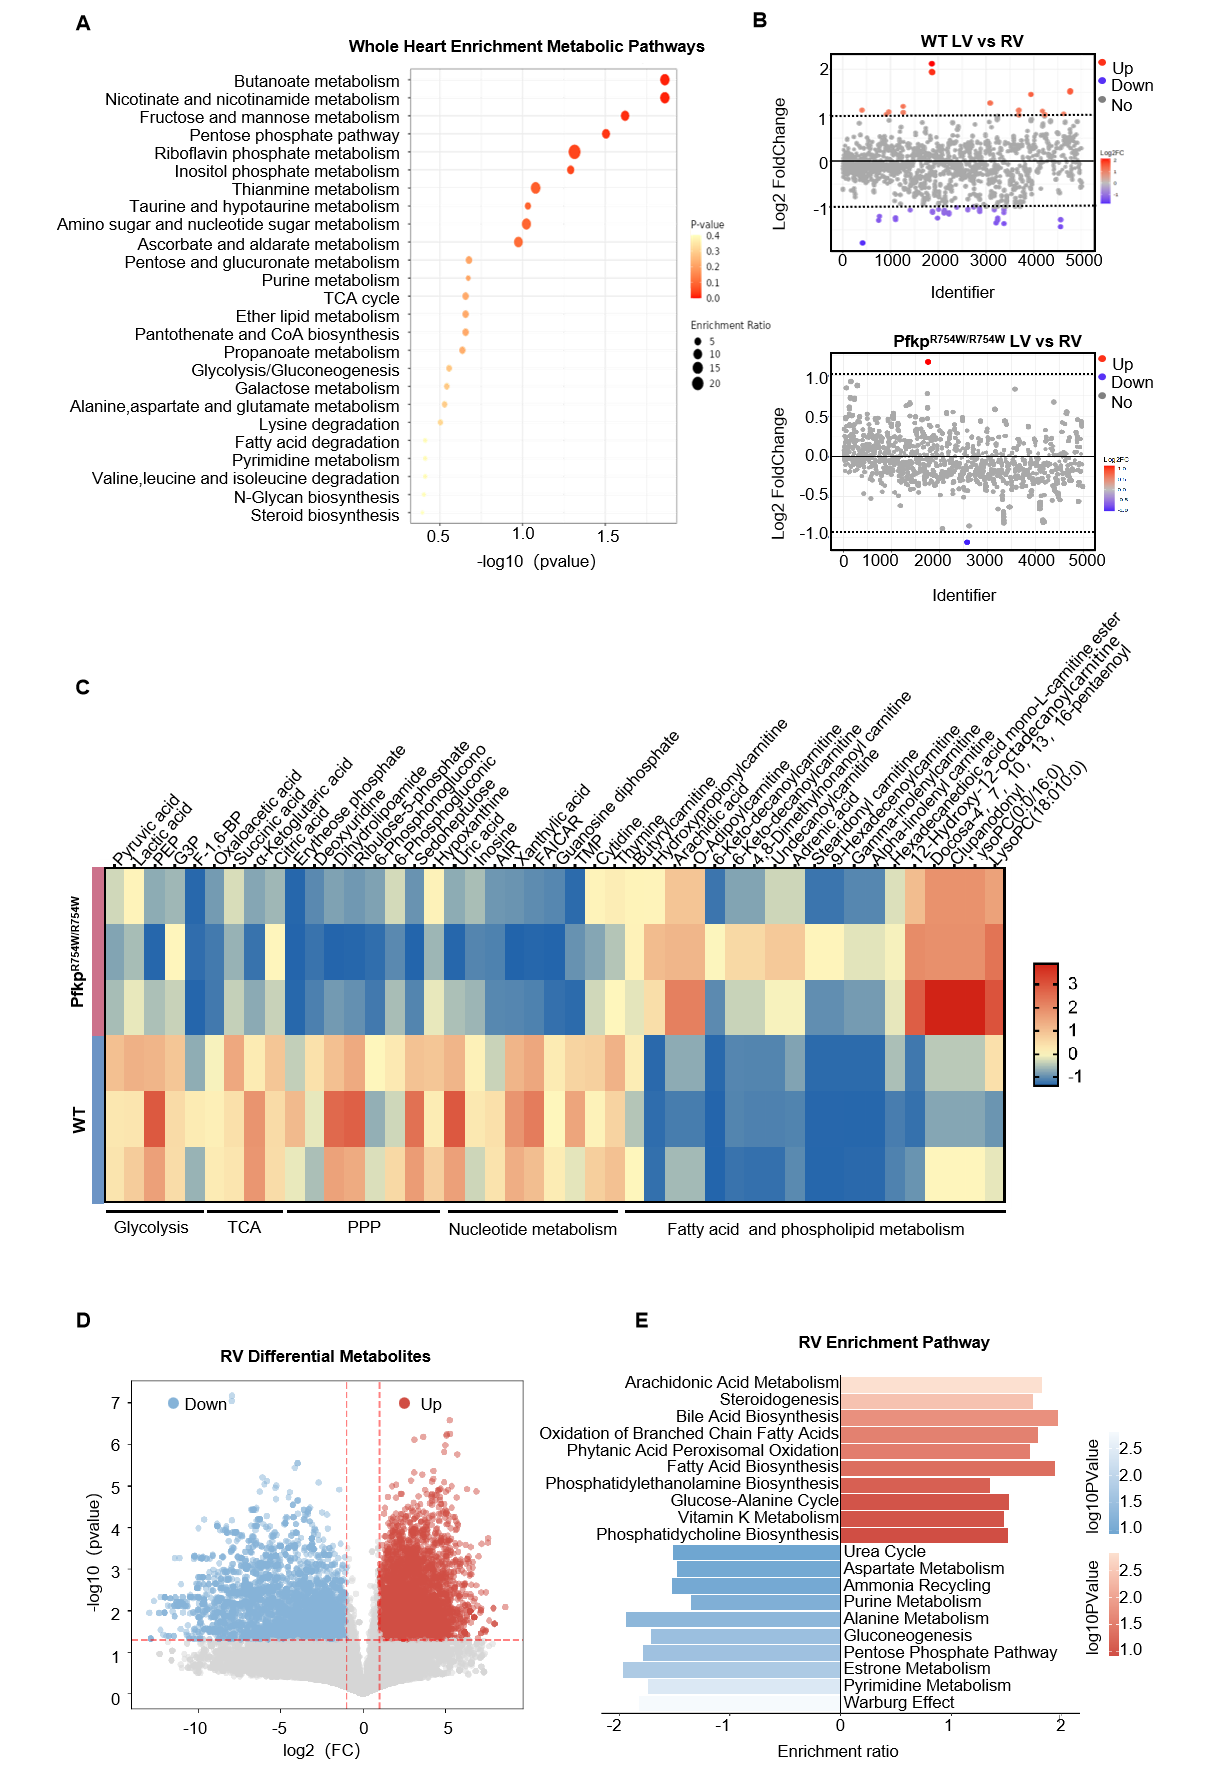


**FigureS8. Altered metabolite profiles and pathways in ventricular walls of PFKP mutation embryonic hearts**

**A.** Metabolite set enrichment analysis (MSEA) of differentially abundant metabolites in WT and PfkpR754W/R754Wwhole embryonic hearts based on LC-MS data.

**B.** Comparison of differential metabolites between the left and right ventricles in the WT group and PfkpR754W/R754W group. Metabolites with an absolute fold change >1 and p < 0.05 (*N* = 3, Student’s *t-test*) are considered differential metabolites.

**C.** Heatmap of differential metabolites (*P* < 0.05, *N* = 3, Student’s *t* test). Heatmap denotes the metabolite signal intensities of each sample, showing significantly altered metabolites that increased and decreased in the PfkpR754W/R754W, relative to the WT hearts.

**D.** Volcano plot of differential metabolite levels of WT and PfkpR754W/R754W mice hearts in the right ventricular wall.

**E.** MSEA of the LC-MS data of differentially expressed metabolites in the right ventricular wall.


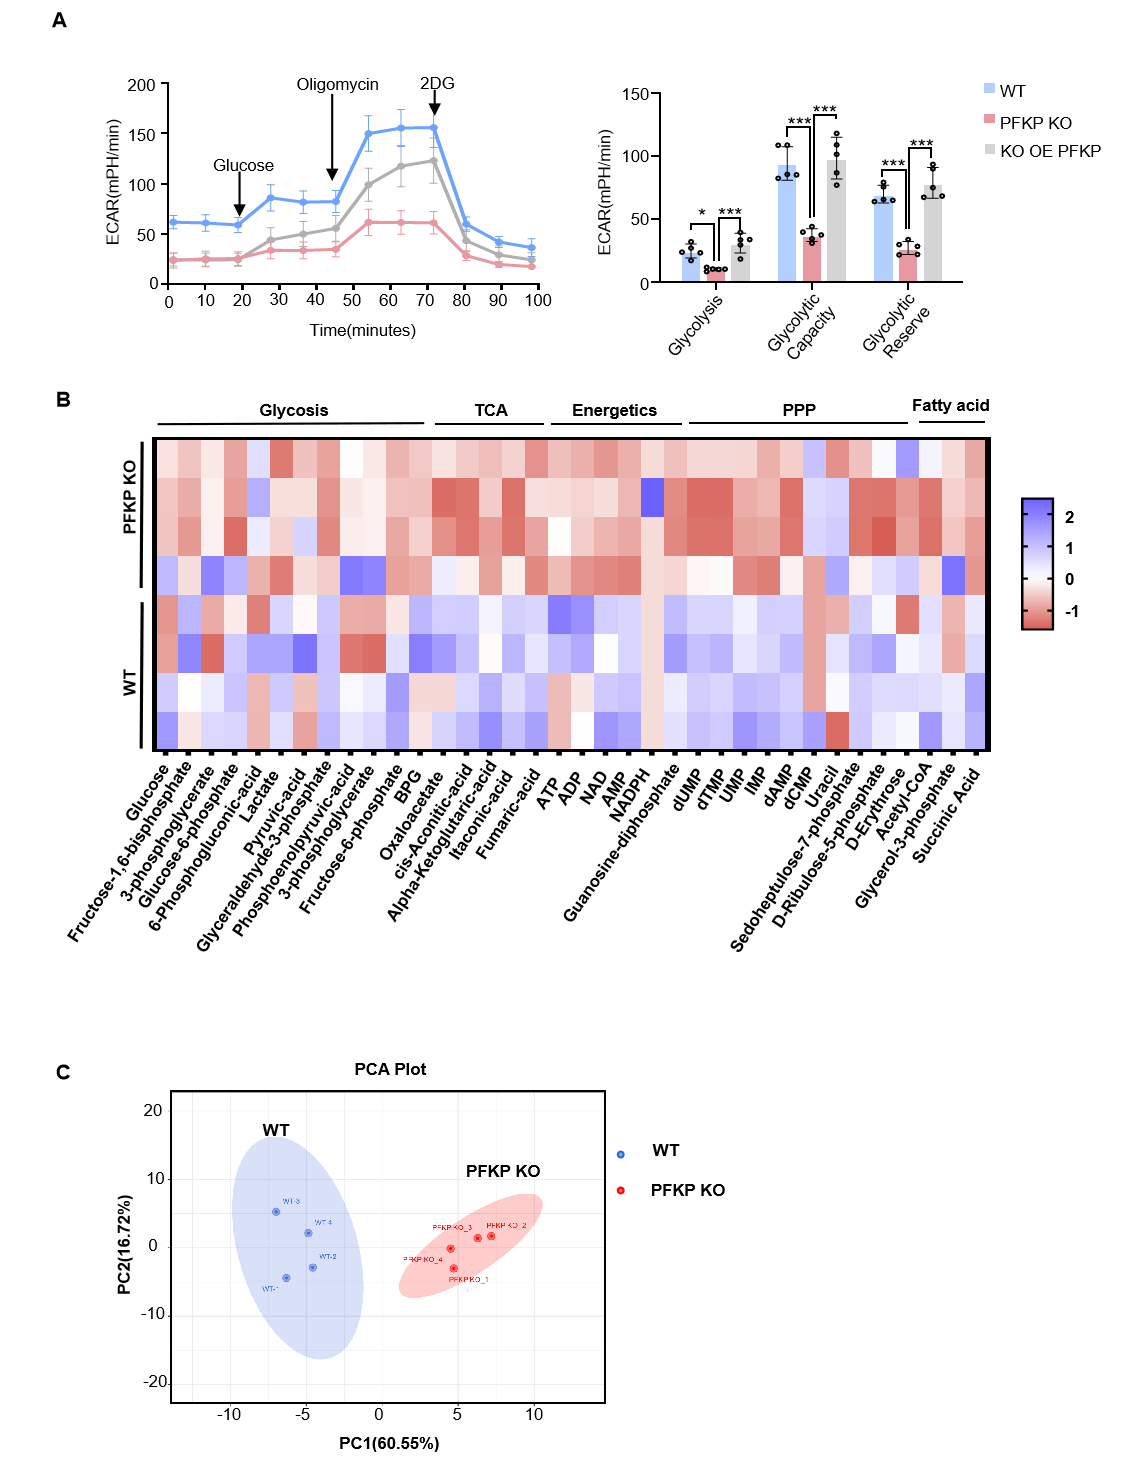


**FigureS9. Altered metabolite profiles in PFKP knockout hESC-CMs**

1. Extracellular acidification rate (ECAR) by Seahorse for glycolysis activity of WT, PFKP KO, and PFKP KO overexpression of PFKP WT protein (KO OE PFKP)hESC-CMs (n=5 per group).
2. Display of differential metabolites between WT and PFKP KO 15-day hESC-CMs (n=4 per group).
3. Principal Component Analysis (PCA) of WT and PFKP KO 15-day hESC-CMs (n=4 per group).

**Supplemental Tables**

**TableS1. Symptoms of patients with myocardial hypoplasia**

| **Symptoms of patients with myocardial hypoplasia** | | | | | | | | | | | | | |
| --- | --- | --- | --- | --- | --- | --- | --- | --- | --- | --- | --- | --- | --- |
| **Family 1** | | | | | | | | | | | **Family 2** | | |
| **Family number** |  | IV-2 | IV-3 | IV-5 | III-2 | III-4 | III-5 | II-2 | II-4 | II-7 | III-2 | II-1 | I-1 |
| **Gender** |  | Unknown | Unknown | M | M | F | F | F | M | F | F | M | M |
| **Age at last survey** |  | Prenantal 24weeks | Prenantal 23weeks | 7 years | 30 years | 26 years | 36 years | 59 years | 62 years | 56 years | 1 day after birth | 30 years | 58 years |
| **Affected gene** |  | NA | PFKP | PFKP | PFKP | PFKP | PFKP | PFKP | PFKP | PFKP | PFKP | PFKP | PFKP |
| **Variation locus** |  | NA | NM_002627.4:c.2263C>T:p.R755W | NM_002627.4:c.2263C>T:p.R755W | NM_002627.4:c.2263C>T:p.R755W | NM_002627.4:c.2263C>T:p.R755W | NM_002627.4:c.2263C>T:p.R755W | NM_002627.4:c.2263C>T:p.R755W | NM_002627.4:c.2263C>T:p.R755W | NM_002627.4:c.2263C>T:p.R755W | NM_002627.4:c.2263C>T:p.R755W | NM_002627.4:c.2263C>T:p.R755W | NM_002627.4:c.2263C>T:p.R755W |
| **Diagnosis** | **Frequency** |  |  |  |  |  |  |  |  |  |  |  |  |
| Thinning of the ventricular septal myocardium | 12/12 | √ | √ | √ | √ | √ | √ | √ | √ | √ | √ | √ | √ |
| Left ventricular apex blunt | 12/12 | √ | √ | √ | √ | √ | √ | √ | √ | √ | √ | √ | √ |
| Reduced left ventricular ejection fraction | 3/12 | √ | √ | / | √ | / | / | / | / | / | / | / | / |
| Myocardial fibrosis | 3/11 | √ | √ | NA | √ | / | / | / | / | / | / | / | / |
| Left ventricular enlargement | 3/12 | √ | √ | / | √ | / | / | / | / | / | / | / | / |
| Right ventricular enlargement | 7/12 | / | √ | / | √ | / | √ | / | √ | / | √ | √ | √ |
| Atrial septal defect | 8/10 | NA | NA | / | √ | √ | √ | √ | √ | √ | √ | / | √ |
| Ventricular septal defect | 2/10 | NA | NA | √ | √ | / | / | / | / | / | / | / | / |
| Right bundle branch block | 7/9 | NA | NA | √ | √ | √ | √ | / | √ | √ | NA | / | √ |
| Frequency of cardiac symptoms identified in the patients with myocardial hypoplasia  √ symptom present, / symptom not present, NA data not available, M:male,F:female | | | | | | | | | | | | | |

**TableS2. Rare protein-coding variants segretating with cardiac phenotype in Family 1 and Family2.**

| **Gene** | **Variant** | **Allele frequencies in the database were compared** | | | | | | | | | | | | | **Prediction of functional consequences of variation** | | | | | | |
| --- | --- | --- | --- | --- | --- | --- | --- | --- | --- | --- | --- | --- | --- | --- | --- | --- | --- | --- | --- | --- | --- |
| PFKP | PFKP:NM_002627.4:exon22:c.2263C>T:p.R755W | 1000g2015aug Chinese | 1000g2015aug eas | 1000g2015augall | esp6500siv2all | ExAC ALL | ExAC_EAS | gnomAD_exome  ALL | gnomAD exome EAS | gnomAD genome ALL | gnomAD exome AC | gnomAD exome AN | gnomAD exome AC EAS | gnomAD exome Hom | REVEL | SIFT_Predicted | MetaSVM | CADD | phyloP100way_vertebrate | gerp++rs |
| N/A | N/A | N/A | N/A | N/A | N/A | N/A | N/A | N/A | N/A | N/A | N/A | N/A | 0.833 | Deleterious(0) | Damaging(0.5851) | 34 | strong conservation(2.368) | highly conserved(3.14) |

**TableS3. Primer used in this study**

| Primer Name | Application | Target | Forward/Reverse primer (5′-3′) |
| --- | --- | --- | --- |
| Pfkpflox/flox(Cre+/+) genotype verifying Primer | PCR | Pfkp flox/flox(Cre+/+) mice | F:CTTTGGGAGGGAGCTTGACAT |
| R:AACAGGTAGAACGGAAGCCT |
| MYH6 Cre genotype verifying Primer | PCR | MYH6 Cre mice | F:ATGACAGACAGATCCCTCCTATCTCC |
| R:CTCATCACTCGTTGCATCATCGAC |
| PfkpR754W mice SgRNA | SgRNA | PfkpR754W mice | AGCAGTGGTGGCTGAAACTGCGG |
| PfkpR754W mice Oligo DNA donor | Oligo | PfkpR754W mice | GCACAGGATCCCCAAGGAGCAGTGGTGGCTGAAACTCTGGCCCATCATGAAGATCTTGGCCAAGTATGAGGCGAGCTATGACATGTCTGATTCAGGCAAGCTGGA |
| PfkpR754W mice genotype verifying Primer | PCR | PfkpR754W mice | F:ACTGGTTTAAGGCCACCCTG |
| R:ACTCCGTCAACAATGCTTGC |
| PFKP knockout hESC genotype verifying Primer | PCR | PFKP exon4 human | F:taaggggtgactggagggag |
| R:agctctgaaacagggcgaaa |
| PFKP qPCR primer for mice | qPCR | Pfkp mice | F:CGCCTATCCGAAGTACCTGGA |
| R:CCCCGTGTAGATTCCCATGC |
| PFKM qPCR primer for mice | qPCR | Pfkm mice | F:CATCGCCGTGTTGACCTCT |
| R:CCCGTGAAGATACCAACTCGG |
| PFKL qPCR primer for mice | qPCR | Pfkl mice | F:GGAGGCGAGAACATCAAGCC |
| R:GCACTGCCAATAATGGTGCC |
| PFKM qPCR primer for Human | qPCR | PFKM human | F:GCTGGGCGGCACTATCATT |
| R:TCAGGTGCGAGTAGGTCCG |
| PFKL qPCR primer for Human | qPCR | PFKL human | F:GGTGCCCGTGTCTTCTTTGT |
| R:AAGCATCATCGAAACGCTCTC |
| PFKP qPCR primer for Human | qPCR | PFKP human | F:GCATGGGTATCTACGTGGGG |
| R:CTCTGCGATGTTTGAGCCTC |

**TableS4. Main Resources Table**

| **REAGENT or RESOURCE** | **SOURCE** | | **IDENTIFIER** |
| --- | --- | --- | --- |
| **Antibodies** | | | |
| PFKP | Abcam | | Cat# ab119796 |
| PFKM | Abcam | | Cat# ab154804 |
| PFKL | Santa cruz | | Cat# sc-393713 |
| GAPDH | Santa cruz | | Cat# sc-365062 |
| Ki67 | Cell signaling | | Cat# 9129T |
| Cardiac Troponin T(Ctnt) | Abcam | | Cat# ab8295 |
| Anti-Histone H3 (phospho S10) | Abcam | | Cat# ab267372 |
| AMPKα | Cell signaling | | Cat #2532 |
| Phospho-AMPKα (Thr172) | Cell signaling | | Cat #50081 |
| p70S6 kinase | Santa cruz | | sc-514501 |
| p-p70 S6 kinase | Santa cruz | | sc-8416 |
| DAPI | Beyotime | | Cat# C1002 |
| Alexa Fluor 488-labeled Goat Anti-Rabbit IgG(H+L) | Beyotime | | Cat# A0423 |
| Alexa Fluor 647-labeled Goat Anti-Mouse IgG(H+L) | Beyotime | | Cat# A0473 |
| IRDye® 800CW Donkey anti-Mouse IgG Secondary Antibody | Licor | | Cat# 926-32212 |
| IRDye® 800CW Goat anti-Rabbit IgG Secondary Antibody | Licor | | Cat# 926-32213 |
| **Bacterial and virus strains** | | | |
| Lenti-PFKP-WT | This paper | | N/A |
| Lenti-PFKP-R755W | This paper | | N/A |
| **Chemicals, peptides, and recombinant proteins** | | | |
| D-Fructose 1,6-bisphosphate trisodium salt hydrate | Sigma | | Cat# F6803 |
| 2-Deoxy-D-glucose | MedChemExpress | | Cat# HY-13966 |
| Y-27632 | MedChemExpress | | Cat# HY-10071 |
| **Critical commercial assays** | | | |
| Seahorse XF Glycolysis Stress Test Kit | Agilent | | Cat# 103020-100 |
| CytoTune®-iPS 2.0 Sendai Reprogramming Kit | Thermo Fisher Scientific | | Cat# [A34546](https://www.thermofisher.cn/order/catalog/product/A34546) |
| Phosphofructokinase Activity Assay Kit | Abcam | | Cat# ab155898 |
| Hematoxylin-Eosin staining Kit | Solarbio | | Cat# G1120 |
| PrimeScript™ Reverse Transcriptase | TaKaRa | | Cat# 2680B |
| SYBR® Premix Ex Taq™ | TaKaRa | | Cat# RR420A |
| **Experimental models: Cell lines** | | | |
| hESC line H9 | Wicell | | N/A |
| HEK 293T | ATCC | | Cat. # CRL-11268 |
| PFKPR755W/+ hiPS line | This paper | | N/A |
| PFKPCorrect/+ hiPS line | This paper | | N/A |
| WT hiPS line | This paper | | N/A |
| **Experimental models: Organisms/strains** | | | |
| Mouse: C57BL/6N- Myh6 Cre/+ | Shanghai Model Organisms Center | | N/A |
| Mouse: C57BL/6N- Pfkpflox/flox | Shanghai Model Organisms Center | | N/A |
| Mouse: C57BL/6N- PfkpR754W/R754W | Shanghai Model Organisms Center | | N/A |
| Mouse: C57BL/6N-Frmd5 KO | Shanghai Model Organisms Center | | N/A |
| **Oligonucleotides** | | | |
| sgRNA spacer target sequences | This paper | TableS3 | |
| Primers used for quantitative RT-PCR | This paper | TableS3 | |
| Primers used for Genotyping | This paper | TableS3 | |
| **Software and algorithms** | | | |
| ImageJ | ImageJ | | https://imagej.net/ij/ |
| Prism 8.0 | GraphPad | | https://www.graphpad.com/ |
| FlowJo V10 | FlowJo | | https://www.flowjo.com/ |
| Caseviewer | Caseviewer | | https://www.3dhistech.com/solutions/caseviewer/ |

**References**

1. McKenna A, Hanna M, Banks E, Sivachenko A, Cibulskis K, Kernytsky A, Garimella K, Altshuler D, Gabriel S, Daly M and DePristo MA. The Genome Analysis Toolkit: a MapReduce framework for analyzing next-generation DNA sequencing data. *Genome Res*. 2010;20:1297-303.

2. Dolzhenko E, Deshpande V, Schlesinger F, Krusche P, Petrovski R, Chen S, Emig-Agius D, Gross A, Narzisi G, Bowman B, Scheffler K, van Vugt J, French C, Sanchis-Juan A, Ibáñez K, Tucci A, Lajoie BR, Veldink JH, Raymond FL, Taft RJ, Bentley DR and Eberle MA. ExpansionHunter: a sequence-graph-based tool to analyze variation in short tandem repeat regions. *Bioinformatics*. 2019;35:4754-4756.

3. Abyzov A, Urban AE, Snyder M and Gerstein M. CNVnator: an approach to discover, genotype, and characterize typical and atypical CNVs from family and population genome sequencing. *Genome Res*. 2011;21:974-84.

4. Layer RM, Chiang C, Quinlan AR and Hall IM. LUMPY: a probabilistic framework for structural variant discovery. *Genome Biol*. 2014;15:R84.

5. Danecek P, Bonfield JK, Liddle J, Marshall J, Ohan V, Pollard MO, Whitwham A, Keane T, McCarthy SA, Davies RM and Li H. Twelve years of SAMtools and BCFtools. *Gigascience*. 2021;10.

6. Quinlan AR and Hall IM. BEDTools: a flexible suite of utilities for comparing genomic features. *Bioinformatics*. 2010;26:841-2.

7. Chiang C, Layer RM, Faust GG, Lindberg MR, Rose DB, Garrison EP, Marth GT, Quinlan AR and Hall IM. SpeedSeq: ultra-fast personal genome analysis and interpretation. *Nat Methods*. 2015;12:966-8.

8. Abel HJ, Larson DE, Regier AA, Chiang C, Das I, Kanchi KL, Layer RM, Neale BM, Salerno WJ, Reeves C, Buyske S, Matise TC, Muzny DM, Zody MC, Lander ES, Dutcher SK, Stitziel NO and Hall IM. Mapping and characterization of structural variation in 17,795 human genomes. *Nature*. 2020;583:83-89.

9. Karczewski KJ, Francioli LC, Tiao G, Cummings BB, Alföldi J, Wang Q, Collins RL, Laricchia KM, Ganna A, Birnbaum DP, Gauthier LD, Brand H, Solomonson M, Watts NA, Rhodes D, Singer-Berk M, England EM, Seaby EG, Kosmicki JA, Walters RK, Tashman K, Farjoun Y, Banks E, Poterba T, Wang A, Seed C, Whiffin N, Chong JX, Samocha KE, Pierce-Hoffman E, Zappala Z, O'Donnell-Luria AH, Minikel EV, Weisburd B, Lek M, Ware JS, Vittal C, Armean IM, Bergelson L, Cibulskis K, Connolly KM, Covarrubias M, Donnelly S, Ferriera S, Gabriel S, Gentry J, Gupta N, Jeandet T, Kaplan D, Llanwarne C, Munshi R, Novod S, Petrillo N, Roazen D, Ruano-Rubio V, Saltzman A, Schleicher M, Soto J, Tibbetts K, Tolonen C, Wade G, Talkowski ME, Neale BM, Daly MJ and MacArthur DG. The mutational constraint spectrum quantified from variation in 141,456 humans. *Nature*. 2020;581:434-443.

10. Cao Y, Li L, Xu M, Feng Z, Sun X, Lu J, Xu Y, Du P, Wang T, Hu R, Ye Z, Shi L, Tang X, Yan L, Gao Z, Chen G, Zhang Y, Chen L, Ning G, Bi Y and Wang W. The ChinaMAP analytics of deep whole genome sequences in 10,588 individuals. *Cell Res*. 2020;30:717-731.

11. Abecasis GR, Cherny SS, Cookson WO and Cardon LR. Merlin--rapid analysis of dense genetic maps using sparse gene flow trees. *Nat Genet*. 2002;30:97-101.

12. Sun H, Yi T, Hao X, Yan H, Wang J, Li Q, Gu X, Zhou X, Wang S, Wang X, Wan P, Han L, Chen J, Zhu H, Zhang H and He Y. Contribution of single-gene defects to congenital cardiac left-sided lesions in the prenatal setting. *Ultrasound Obstet Gynecol*. 2020;56:225-232.

13. Richards S, Aziz N, Bale S, Bick D, Das S, Gastier-Foster J, Grody WW, Hegde M, Lyon E, Spector E, Voelkerding K and Rehm HL. Standards and guidelines for the interpretation of sequence variants: a joint consensus recommendation of the American College of Medical Genetics and Genomics and the Association for Molecular Pathology. *Genet Med*. 2015;17:405-24.

14. Xie Y, Wang D, Lan F, Wei G, Ni T, Chai R, Liu D, Hu S, Li M, Li D, Wang H and Wang Y. An episomal vector-based CRISPR/Cas9 system for highly efficient gene knockout in human pluripotent stem cells. *Sci Rep*. 2017;7:2320.
